# Supplementary material for: Fluorine-enhanced Pt/ZSM-5 catalysts for low-temperature oxidation of ethylene
Source: Royal Society of Chemistry journal article supplement (doi:10.1039/c8cy00130h), 2018-01-01
Supplement: c8cy00130h1.pdf [file c8cy00130h1.pdf]

## Supplementary material

### Fluorine-enhanced Pt/ZSM-5 catalysts for low-temperature oxidation of ethylene

Hongling Yang,<sup>a,b</sup> Chunyan Ma,<sup>a,b</sup> Gang Wang,<sup>a,b</sup> Yonggang Sun,<sup>a,b</sup> Jie Cheng,<sup>a,b</sup>

Zhongshen Zhang,<sup>\*,a,b</sup> Xin Zhang,<sup>a,b</sup> Zhengping Hao<sup>\*,a,b</sup>

<sup>a</sup> National Engineering Laboratory for VOCs Pollution Control Material & Technology, University of Chinese Academy of Sciences, Beijing 100049, China

<sup>b</sup> Department of Environmental Nano-materials and Technologies, Research Center for Eco-Environmental Sciences, Chinese Academy of Sciences, Beijing 100085, China

\*E-mail: zpinghao@rcees.ac.cn; zhangzs@rcees.ac.cn

### 1.1. Catalyst characterization

O<sub>2</sub>-TPD was conducted in a Micromeritics Chemisorb 2720 apparatus. Before TPD run, 100 mg of catalyst was pretreated in helium (He) at a flow rate of 50 mL·min<sup>-1</sup> at 300°C for 1 h in a quartz U-tube reactor and then cooled to room temperature. The adsorption process was performed by exposing the catalyst to a 50mL·min<sup>-1</sup> flow of 5% O<sub>2</sub>/He for 30 min. Then, He was fed into the reactor at 50 mL·min<sup>-1</sup> for 30 min to purge residual O<sub>2</sub>. The O<sub>2</sub>-TPD was performed by heating the catalyst from 25 °C to 600 °C at a constant heating rate of 10 °C·min<sup>-1</sup> under He flow of 50 mL·min<sup>-1</sup>. The desorbed O<sub>2</sub> was monitored with a thermal conductivity detector.

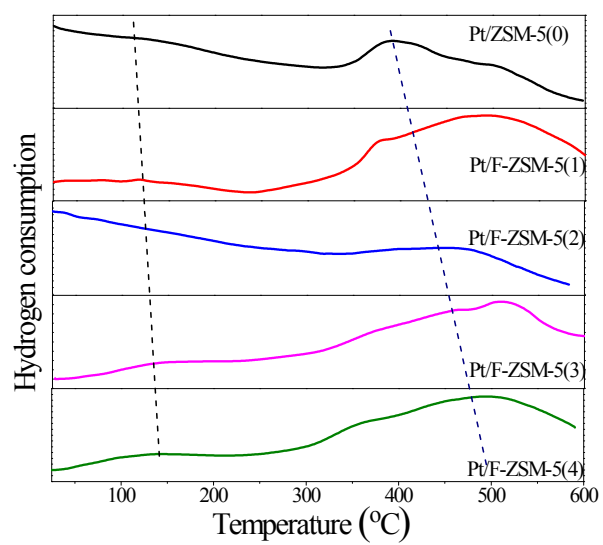

Fig. S1 H<sub>2</sub>-TPR profiles of Pt/ZSM-5(0) and Pt/F-ZSM-5 catalysts.

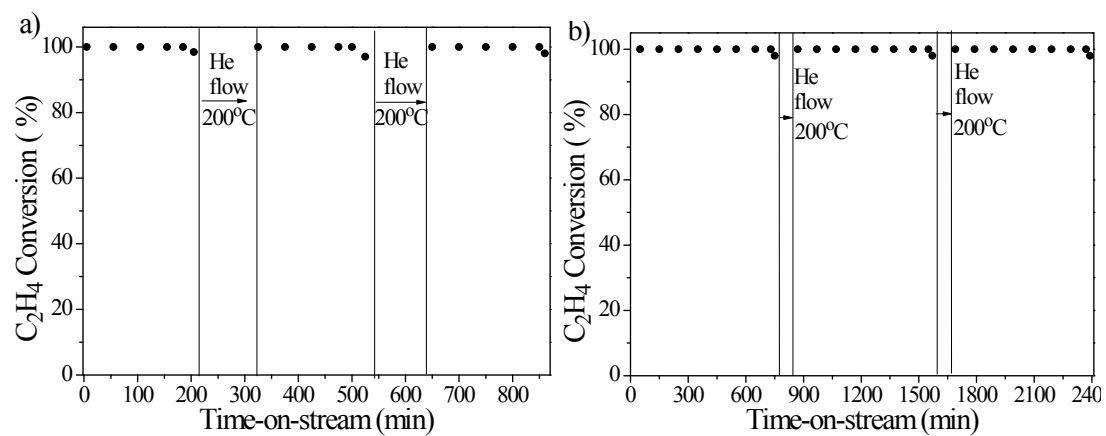

Fig.S2 Catalytic performances of (a) Pt/ZSM-5(0) and (b) Pt/F-ZSM-5(2) catalysts at 25°C; Space velocity: 7500 mL·h<sup>-1</sup>·g<sup>-1</sup>; catalyst: 0.20 g; C<sub>2</sub>H<sub>4</sub>: 100 ppm; O<sub>2</sub>: 21 vol %; He balance.

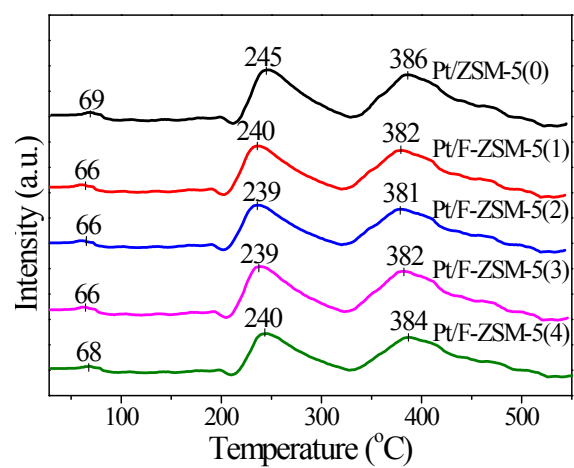

Fig. S3 O<sub>2</sub>-TPD profiles of Pt/ZSM-5(0) and Pt/F-ZSM-5 catalysts.
